# Supplementary material for: Differences in Cholesterol Metabolism, Hepato-Intestinal Aging, and Hepatic Endocrine Milieu in Rats as Affected by the Sex and Age
Source: MDPI journal article supplement (doi:10.3390/ijms241612624), 2023-08-10
Supplement: s1 [file s1]

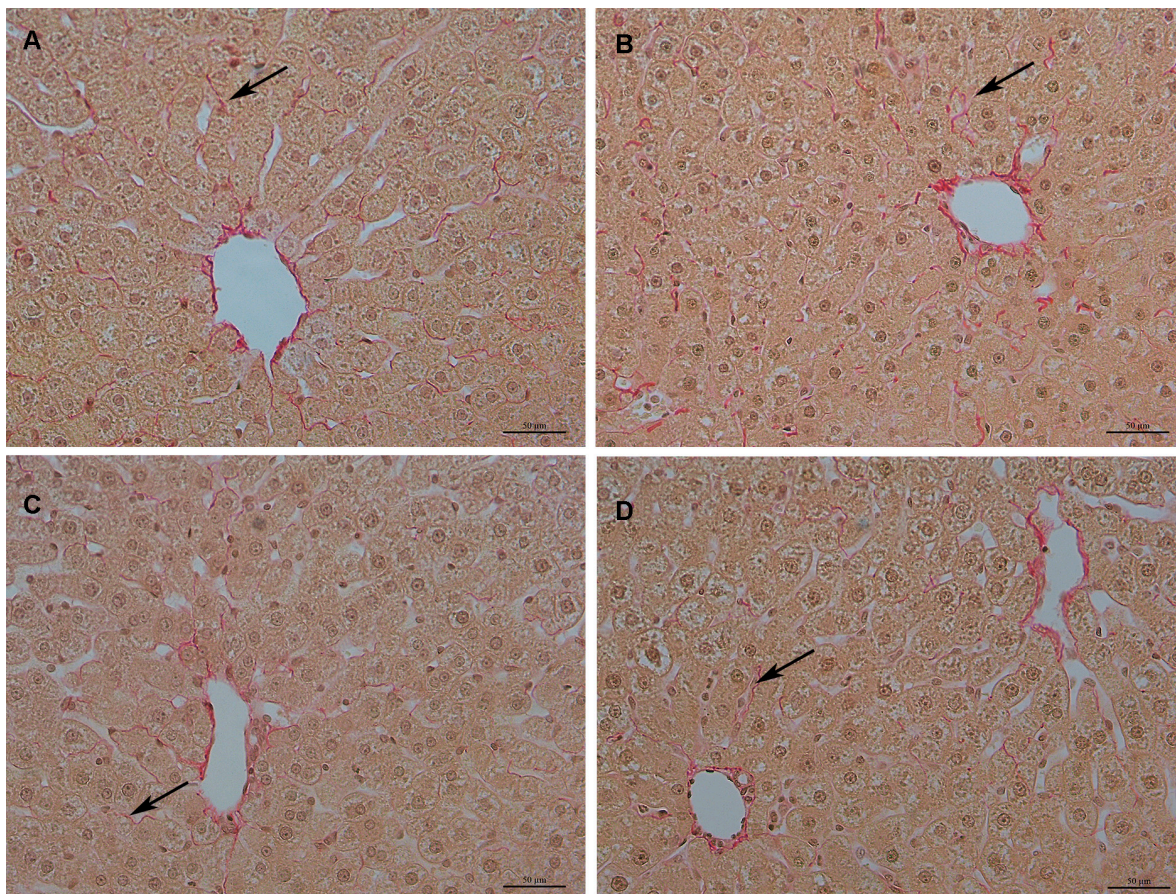

**Figure S1.** Representative micrographs of Sirius Red-stained liver sections from young (4-month-old) and old-aged (24-month-old) male (A,B) and female (C,D) rats, respectively; black arrows point on collagen fibers.
